# Supplementary material for: The Catenulida flatworm can express genes from its microbiome or from the DNA it ingests
Source: PubMed Central journal article supplement (PMC6910973; doi:10.1038/s41598-019-55659-w), 2019-12-13
Supplement: 41598_2019_55659_MOESM1_ESM.pdf [file 41598_2019_55659_MOESM1_ESM.pdf]

## Supplementary Material

The Catenulida flatworm can express genes from its microbiome or from the DNA it ingests

**Supplementary movie1** – A comparison between *Stenostomum leucops* SL0-sm02 that consumed bacteria harbouring plasmids with *gfp* gene and worms that have ingested bacteria without the plasmids, under bright-field and fluorescence microscopy.

**Supplementary Table 1 - Summary statistics of plasmids assembly**

| Plasmid             | Assemblage              | Length bp | Reads used | Mismatch | Max. coverage | Average coverage |
|---------------------|-------------------------|-----------|------------|----------|---------------|------------------|
| pBac [3xp3-EGFPafm] | 1 contig (circularized) | 8,876     | 1969       | 4.1      | 152           | 57.961           |
| pBASac              | 1 contig (circularized) | 5,906     | 1368       | 3.8      | 147           | 48.781           |

The *S. leucops* genome was sequenced using the Illumina MiSeq platform and generated 13,643,983 reads with size among 35-301 bp. After trimming, it was filtered 10,583,723 reads with size among 50-300 bp, these data were used for the plasmids assemblage. Both plasmids (pBac [3xp3-EGFPafm] and pBASac) were assembled complete and circularized.

**Supplementary Table 2 - Summary of microbiome associated with the *Stenostomum* strains used in this study:** *Stenostomum leucops* SL0-sm01 and SL0-sm02; *Stenostomum sp.* Ssp-sm09. The results are expressed in % of reads. In blue are highlighted the bacterial species shared among the three strains; in red between SL0-sm02 and Ssp-sm09; in yellow between SL0-sm01 and Ssp-sm09.

| Bacteria species                        | SL0-sm01<br>% of reads | SL0-sm02<br>% of reads | Ssp-sm09<br>% of reads |
|-----------------------------------------|------------------------|------------------------|------------------------|
| <i>Acidovorax delafieldii</i>           | 0                      | 0.82                   | 0.06                   |
| <i>Acidovorax soli</i>                  | 0                      | 0                      | 0.28                   |
| <i>Acinetobacter johsonii</i>           | 0                      | 0                      | 0.38                   |
| <i>Acinetobacter lwoffii</i>            | 0                      | 0                      | 0.03                   |
| <i>Acinetobacter ursingii</i>           | 0                      | 0                      | 0.50                   |
| <i>Actinomyces oris</i>                 | 0                      | 0                      | 0.06                   |
| <i>Actinomyces viscosus</i>             | 0                      | 0                      | 0.06                   |
| <i>Aeromonas hydrophila</i>             | 0                      | 0                      | 0.03                   |
| <i>Agrobacterium tumefaciens</i>        | 0                      | 0.49                   | 1.28                   |
| <i>Altererythrobacter epoxidivorans</i> | 0                      | 2.70                   | 3.54                   |
| <i>Arthrobacter ureafaciens</i>         | 0                      | 0                      | 0.03                   |
| <i>Aureimonas jatrophae</i>             | 0                      | 0                      | 0.03                   |
| <i>Bacillus cereus sp. group</i>        | 85.02                  | 1.23                   | 0.22                   |
| <i>Bacillus oshimensis</i>              | 0                      | 0                      | 0.06                   |
| <i>Bacillus subtilis</i>                | 0.06                   | 0                      | 0                      |
| <i>Blastomonas natatoria</i>            | 0                      | 1.96                   | 0                      |
| <i>Bosea massiliensis</i>               | 0                      | 2.13                   | 0                      |
| <i>Bosea thiooxidans</i>                | 0                      | 0                      | 0.09                   |
| <i>Brachybacterium faecium</i>          | 0                      | 0                      | 0.06                   |
| <i>Brachybacterium sacelli</i>          | 0                      | 0                      | 0.13                   |
| <i>Bradyrhizobium elkanii</i>           | 0                      | 0                      | 0.22                   |
| <i>Bradyrhizobium genosp. SA-1</i>      | 0                      | 0                      | 0.19                   |
| <i>Brassicogethes aeneus</i>            | 0.05                   | 0                      | 0                      |
| <i>Brevibacterium aureum</i>            | 0                      | 0                      | 0.16                   |
| <i>Brevibacterium epidermidis</i>       | 0                      | 0                      | 0.03                   |
| <i>Brevibacterium iodinum</i>           | 0                      | 0                      | 0.03                   |
| <i>Brevibacterium pityocampae</i>       | 0                      | 0                      | 0.03                   |

|                                              |       |       |      |
|----------------------------------------------|-------|-------|------|
| <i>Brevibacterium senegalense</i>            | 0     | 0     | 0,03 |
| <i>Brevundimonas alba</i>                    | 0     | 9.82  | 0    |
| <i>Brevundimonas subvibrioides</i>           | 0     | 0     | 0,13 |
| <i>Brevundimonas vesicularis</i>             | 0     | 0     | 0,03 |
| <i>Candidatus Prevotella conceptionensis</i> | 0     | 0     | 0,03 |
| <i>Caulobacter sp.</i>                       | 0     | 0     | 1,44 |
| <i>Caulobacter vibrioides</i>                | 0     | 0     | 0,03 |
| <i>Chryseobacterium viscerum</i>             | 0     | 0     | 0,03 |
| <i>Corynebacterium accolens</i>              | 0     | 0     | 0,78 |
| <i>Corynebacterium afermentans</i>           | 0     | 0     | 0,06 |
| <i>Corynebacterium coyleae</i>               | 0     | 0     | 0,06 |
| <i>Corynebacterium durum</i>                 | 0     | 0     | 0,03 |
| <i>Corynebacterium fastidiosum</i>           | 0     | 0     | 0,03 |
| <i>Corynebacterium imitans</i>               | 0     | 0     | 0,03 |
| <i>Corynebacterium jeikeium</i>              | 0     | 0     | 0,03 |
| <i>Corynebacterium mucifaciens</i>           | 0     | 0     | 0,06 |
| <i>Corynebacterium singulare</i>             | 0     | 0     | 0,38 |
| <i>Corynebacterium thomssenii</i>            | 0     | 0     | 0,13 |
| <i>Corynebacterium tuberculostearicum</i>    | 0     | 0     | 0,41 |
| <i>Cryobacterium arcticum</i>                | 0     | 0     | 0,03 |
| <i>Cryobacterium psychrotolerans</i>         | 0     | 0     | 1,69 |
| <i>Cupriavidus metallidurans</i>             | 0     | 0     | 0,09 |
| <i>Curvibacter delicatus</i>                 | 0     | 0     | 0,16 |
| <i>Dermabacter hominis</i>                   | 0     | 0     | 0,06 |
| <i>Devosia insulae</i>                       | 0     | 0     | 2,82 |
| <i>Dietzia psychrhalcaliphila</i>            | 0     | 0     | 0,06 |
| <i>Dietzia timorensis</i>                    | 0     | 0     | 0,22 |
| <i>Dolosigranulum pigrum</i>                 | 0     | 0     | 0,03 |
| <i>Dyadobacter fermentans</i>                | 0     | 0     | 0,03 |
| <i>Dyadobacter soli</i>                      | 0     | 0     | 2,74 |
| <i>Empedobacter falsenii</i>                 | 0     | 0     | 0,03 |
| <i>Ensifer adhaerens</i>                     | 0     | 19.48 | 0    |
| <i>Enterobacter falsenii</i>                 | 0     | 0     | 0,03 |
| <i>Enterobacter aerogenes</i>                | 0     | 0     | 0,03 |
| <i>Escherichia coli</i>                      | 14.73 | 0     | 0,03 |
| <i>Finegoldia magna</i>                      | 0     | 0     | 0,03 |
| <i>Gemmobacter aquaticus</i>                 | 0     | 0.49  | 0    |
| <i>Gemmobacter lanyensis</i>                 | 0     | 0     | 0,03 |
| <i>Globicatella sanguinis</i>                | 0     | 0     | 0,03 |
| <i>Haemophilus parainfluenzae</i>            | 0     | 0     | 0,06 |
| <i>Hyphomicrobium vulgare</i>                | 0     | 12.93 | 0,28 |
| <i>Hyphomicrobium zavarzinii</i>             | 0     | 3.85  | 0    |
| <i>Janibacter limosus</i>                    | 0     | 0     | 0,19 |
| <i>Kingella oralis</i>                       | 0     | 0     | 0,03 |
| <i>Kocuria kristinae</i>                     | 0     | 0     | 0,03 |
| <i>Kocurria palustris</i>                    | 0     | 0     | 0,03 |
| <i>Lactobacillus acidophilus</i>             | 0     | 0     | 0,03 |
| <i>Lactococcus lactis</i>                    | 0     | 0     | 0,06 |
| <i>Lautropia mirabilis</i>                   | 0     | 0     | 0,03 |
| <i>Leifsonia xyli</i>                        | 0     | 0     | 0,03 |
| <i>Massilia haematophila</i>                 | 0     | 0     | 0,03 |

|                                         |   |      |       |
|-----------------------------------------|---|------|-------|
| <i>Massilia suwonensis</i>              | 0 | 0.41 | 0     |
| <i>Mesorhizobium amorphae</i>           | 0 | 0    | 0,13  |
| <i>Mesorhizobium loti</i>               | 0 | 0    | 0,06  |
| <i>Methylobacterium hispanicum</i>      | 0 | 0    | 0,03  |
| <i>Methylobacterium komagatae</i>       | 0 | 0    | 0,5   |
| <i>Methylobacterium radiotolerans</i>   | 0 | 0    | 0,34  |
| <i>Methyloversatilis universalis</i>    | 0 | 0    | 0,03  |
| <i>Moraxella sp.</i>                    | 0 | 0    | 0,03  |
| <i>Mycobacterium mucogenicum</i>        | 0 | 0.49 | 0     |
| <i>Nevskia ramosa</i>                   | 0 | 9.74 | 40,68 |
| <i>Nitrospira sp.</i>                   | 0 | 1.39 | 0     |
| <i>Nocardioides fonticola</i>           | 0 | 0.82 | 0     |
| <i>Novosphingobium aromaticivorans</i>  | 0 | 0    | 0,03  |
| <i>Novosphingobium nitrogenifigens</i>  | 0 | 0    | 0,03  |
| <i>Novosphingobium panipatense</i>      | 0 | 3.27 | 0     |
| <i>Novosphingobium soli</i>             | 0 | 0    | 0,03  |
| <i>Novosphingobium subterraneum</i>     | 0 | 0    | 0,13  |
| <i>Ochrobactrum anthropi</i>            | 0 | 0    | 0,06  |
| <i>Ochrobactrum pseudogrignonense</i>   | 0 | 0    | 0,03  |
| <i>Panacagrimonas perspica</i>          | 0 | 7.77 | 0     |
| <i>Pantoea ananatis</i>                 | 0 | 0    | 0,03  |
| <i>Pedobacter agri</i>                  | 0 | 0    | 0,03  |
| <i>Pedomicrobium americanum</i>         | 0 | 0    | 0,06  |
| <i>Pelomonas puraquae</i>               | 0 | 0    | 0,28  |
| <i>Pelomonas saccharophila</i>          | 0 | 0.41 | 0,22  |
| <i>Peptoniphilus gorbachii</i>          | 0 | 0    | 0,03  |
| <i>Phenylobacterium murchangponense</i> | 0 | 0    | 0,06  |
| <i>Polynucleobacter acidiphobus</i>     | 0 | 0    | 4,58  |
| <i>Porphyrobacter donghaensis</i>       | 0 | 0    | 0,41  |
| <i>Porphyrobacter neustonensis</i>      | 0 | 0    | 0,5   |
| <i>Pseudarciella hirudinis</i>          | 0 | 0    | 0,09  |
| <i>Pseudomonas alcaligenes</i>          | 0 | 0.49 | 0     |
| <i>Pseudomonas fluorescens</i>          | 0 | 0.65 | 0,06  |
| <i>Pseudomonas pseudoalcaligenes</i>    | 0 | 0    | 0,56  |
| <i>Pseudomonas putida</i>               | 0 | 4.17 | 0,38  |
| <i>Pseudonocardia alni</i>              | 0 | 0.41 | 0     |
| <i>Ralstonia pickettii</i>              | 0 | 0    | 0,5   |
| <i>Rhizobium nepotum</i>                | 0 | 0    | 0,06  |
| <i>Rothia aerea</i>                     | 0 | 0    | 0,06  |
| <i>Rothia amarae</i>                    | 0 | 0    | 0,13  |
| <i>Rubrobacter xylanophilus</i>         | 0 | 0    | 0,03  |
| <i>Sandarakinorhabdus limnophila</i>    | 0 | 0    | 0,06  |
| <i>Sediminibacterium salmoneum</i>      | 0 | 3.03 | 18,27 |
| <i>Shinella yambaruensis</i>            | 0 | 1.15 | 0     |
| <i>Smaragdicoccus niigatensis</i>       | 0 | 2.95 | 0     |
| <i>Serratia marcenscens</i>             | 0 | 0    | 0,28  |
| <i>Sphingobium yanoikuyae</i>           | 0 | 0.74 | 0,06  |
| <i>Sphingomonas canadensis</i>          | 0 | 0    | 0,13  |
| <i>Sphingomonas changbaiensis</i>       | 0 | 0.65 | 0     |
| <i>Sphingomonas cynarae</i>             | 0 | 0    | 0,03  |
| <i>Sphingomonas echinoides</i>          | 0 | 0    | 0,38  |
| <i>Sphingomonas leidyi</i>              | 0 | 0    | 1,19  |

|                                        |      |      |      |
|----------------------------------------|------|------|------|
| <i>Sphingomonas melonis</i>            | 0    | 0    | 0,69 |
| <i>Sphingomonas sanxanigenens</i>      | 0    | 0    | 0,03 |
| <i>Sphingomonas sp.</i>                | 0.06 | 0    | 0    |
| <i>Staphylococcus aureus</i>           | 0    | 0    | 0,03 |
| <i>Staphylococcus capitis</i>          | 0    | 0    | 0,13 |
| <i>Staphylococcus cohnii</i>           | 0    | 0    | 0,06 |
| <i>Staphylococcus epidermidis</i>      | 0    | 0.57 | 0,56 |
| <i>Staphylococcus haemolyticus</i>     | 0    | 0    | 0,03 |
| <i>Staphylococcus hominis</i>          | 0    | 0    | 0,06 |
| <i>Staphylococcus pasteurii</i>        | 0    | 0    | 0,16 |
| <i>Staphylococcus pseudintermedius</i> | 0    | 0    | 0,06 |
| <i>Staphylococcus saprophyticus</i>    | 0    | 0    | 1,35 |
| <i>Staphylococcus warneri</i>          | 0    | 0    | 0,47 |
| <i>Stella vacuolata</i>                | 0    | 0.74 | 0    |
| <i>Stenotrophomonas maltophilia</i>    | 0    | 0    | 0,06 |
| <i>Stenotrophomonas rhizophila</i>     | 0    | 0    | 0,06 |
| <i>Streptococcus australis</i>         | 0    | 0    | 0,03 |
| <i>Streptococcus macedonicus</i>       | 0    | 0    | 0,03 |
| <i>Streptococcus oralis</i>            | 0    | 0.49 | 0,13 |
| <i>Streptococcus salivarius</i>        | 0    | 0    | 0,09 |
| <i>Streptococcus sanguinis</i>         | 0    | 0    | 0,09 |
| <i>Uncultured Oscillatoria sp.</i>     | 0    | 0    | 0,03 |
| <i>Variovorax paradoxus</i>            | 0    | 0.41 | 0    |
| <i>Veillonella parvula</i>             | 0    | 0    | 0,03 |
| <i>Woodsholea maritima</i>             | 0    | 1.47 | 0,03 |
| <i>Zavarzinia compransoris</i>         | 0    | 1.88 | 0    |

**Supplementary Table 3 – Primers used, PCR parameters**

| Amplification                                                                                            | Primers                                                                                                                                                                                        | Parameters                                                                                  | Amplicon size                                                  |
|----------------------------------------------------------------------------------------------------------|------------------------------------------------------------------------------------------------------------------------------------------------------------------------------------------------|---------------------------------------------------------------------------------------------|----------------------------------------------------------------|
| plasmid pBac [3xp3-EGFPafm] / <i>gfp</i> gene and flanking sequences<br><br>(see Supplementary Figure 1) | pyBACqPCR_F:<br>CAATCTCACAGACAG<br>CGTTGACAATCTCAC<br><br>pyBACqPCR_exc<br>CGACTTGGTTTGCCA<br>TTCTT<br><br>ygfR_Elg<br>TTACTTGTACAGCTCT<br>CGTCCATGC<br><br>ygfF_Elg<br>ATGGTGAGCAAGGGC<br>GAG | 95°C-5 min<br>[95°C-1min<br>58°C-30sec<br>72°C-2min: 30 sec]X35<br>72°C-7 min<br>4°C-∞      | 3394 bp<br>2700bp<br>723bp<br><br>(see Supplementary Figure 1) |
| Bacterial 16S V3-V4 ribosomal gene (rRNA)                                                                | 341F CCTACGGGRSG<br>CAGCAG<br><br>806R<br>GGACTACHVGGGTW<br>TCTAAT                                                                                                                             | 95°C for 5 min<br>[95°C for 45s,<br>55°C for 30s and<br>72°C for 45s] x35<br>72°C for 2 min | 305bp                                                          |

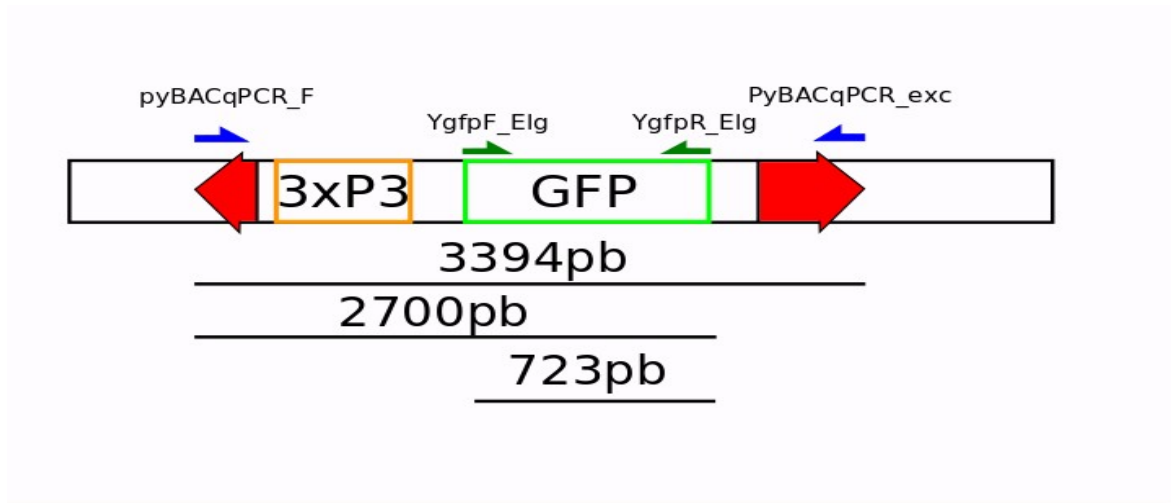

**Supplementary Figure 1: Schematic representation of primers used and amplicons produced in PCR assays, testing the presence of pBac [3xp3-EGFPafm] plasmid, in worms fed with bacteria harbouring this plasmid.**

**Supplementary Table 4: Results of PCR assays, using different set of primers, for SL0-sm01 and SL0-sm02 worms fed with *E. coli* harbouring pBac [3xp3-EGFPafm] plasmid, 3 and 15 days after of the bacterial ingestion**

| PCR primers/amplicon size              | SL0-sm01     |               | SL0-sm02     |               |
|----------------------------------------|--------------|---------------|--------------|---------------|
|                                        | 3 days after | 15 days after | 3 days after | 15 days after |
| pyBACqPCR_F - PyBACqPCR_exc<br>3394 pb | +            | +             | +            | -             |
| pyBACqPCR_F - ygfpR_Elg<br>2700 pb     | +            | +             | +            | -             |
| YgfpF_Elg - ygfpR_Elg<br>723 pb        | +            | +             | +            | -             |

**Supplementary Figure 2- Long term maintenance of wild *E. coli* bacteria in *Stenostomum leucops* SL0-sm02 strain**

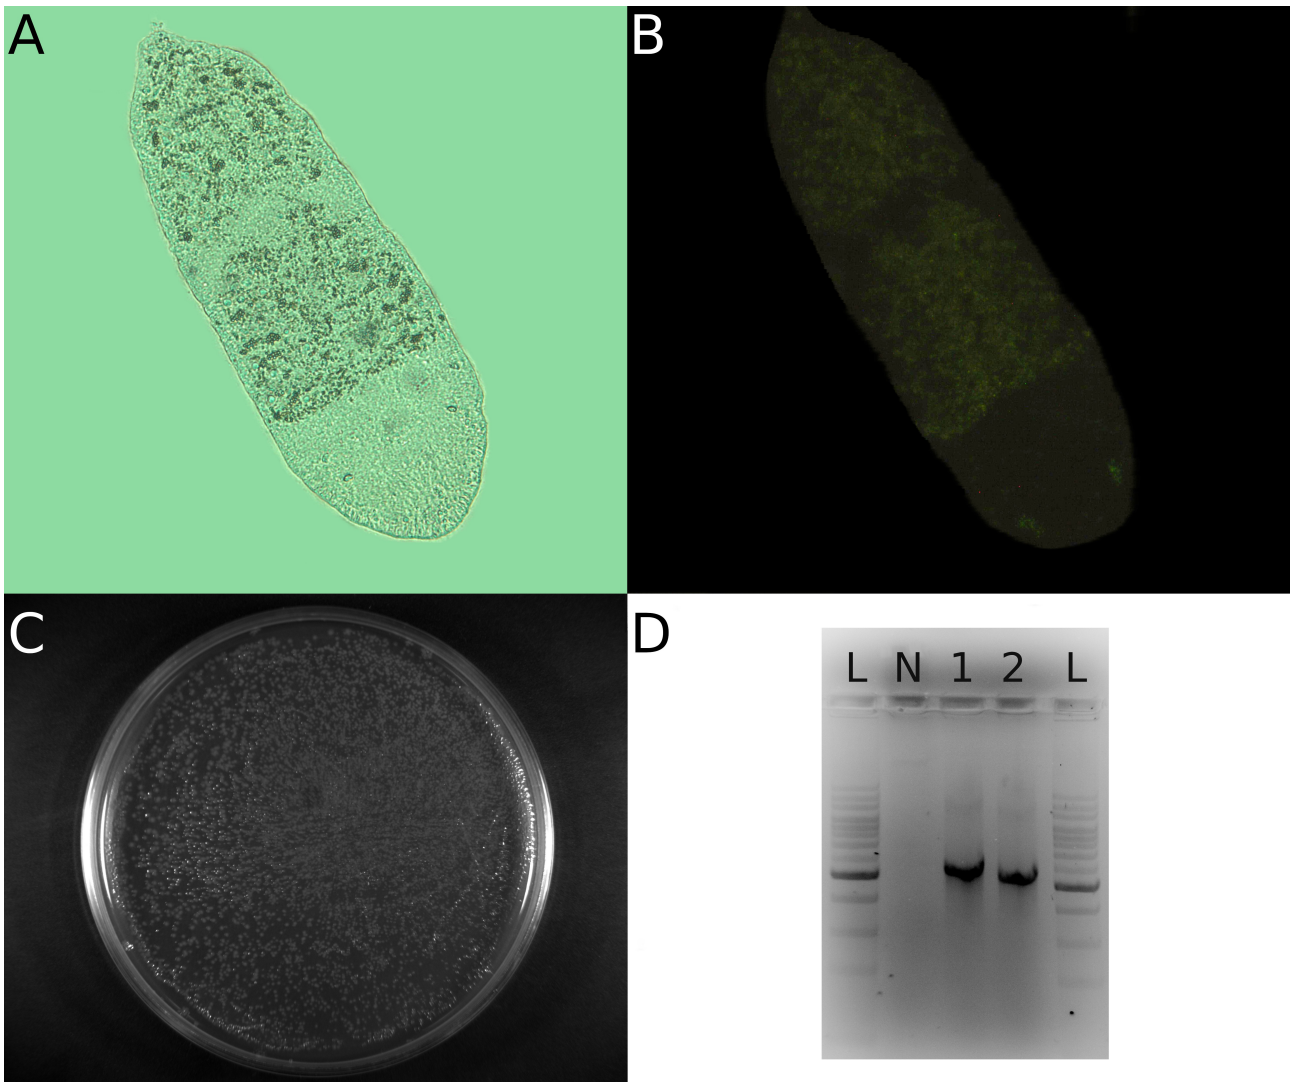

**Supplementary Figure 2- maintenance of native *E. coli* bacteria in the *S. leucops*.**

*Stenostomum leucops* SL0-sm02 strain three months after receive wild *E. coli* bacteria harbouring the pBac [3xp3-EGFPafm] plasmid. These worms were fed only once with this bacterium, which is thereafter kept in the worm microbiome. A) Bright-field microscopy of SL0-sm02 worm; B) under fluorescence microscopy; C) worms were mechanically disintegrated and plated in a LB medium with ampicillin antibiotic. As can be seen, *E. coli* bacteria were maintained (confirmed by Sanger sequencing of rRNA 16 gene; five bacterial colonies had de DNA sequenced); D) PCR assay showing amplification of a region of pBac [3xp3-EGFPafm] plasmid (L = Kb ladder; N = control-none DNA template; 1= amplicom -2.7kb- generated using DNA extracted from a colony of bacteria obtained three months after feeding the worms with bacteria harbouring the plasmid; 2 = positive control, DNA of pBac [3xp3-EGFPafm] plasmid used as template). Fifteen bacterial colonies were tested by PCR and showed amplicons similar to the one showed in lane 1.
